# Supplementary material for: Pseudotyped Bat Coronavirus RaTG13 is efficiently neutralised by convalescent sera from SARS-CoV-2 infected patients
Source: PubMed Central journal article supplement (PMC9065041; doi:10.1038/s42003-022-03325-9), 2022-05-03
Supplement: 42003_2022_3325_MOESM3_ESM.pdf [file 42003_2022_3325_MOESM3_ESM.pdf]

## Description of Additional Supplementary Files

**File name:** Supplementary Data 1

**Description:** Source data for manuscript.
